# Supplementary material
Source: publisher site journal article supplement (https://www.dovepress.com/article/310300)
Supplement: Supplementary file 1 [file get_supplementary_file.php]

Supplementary files:


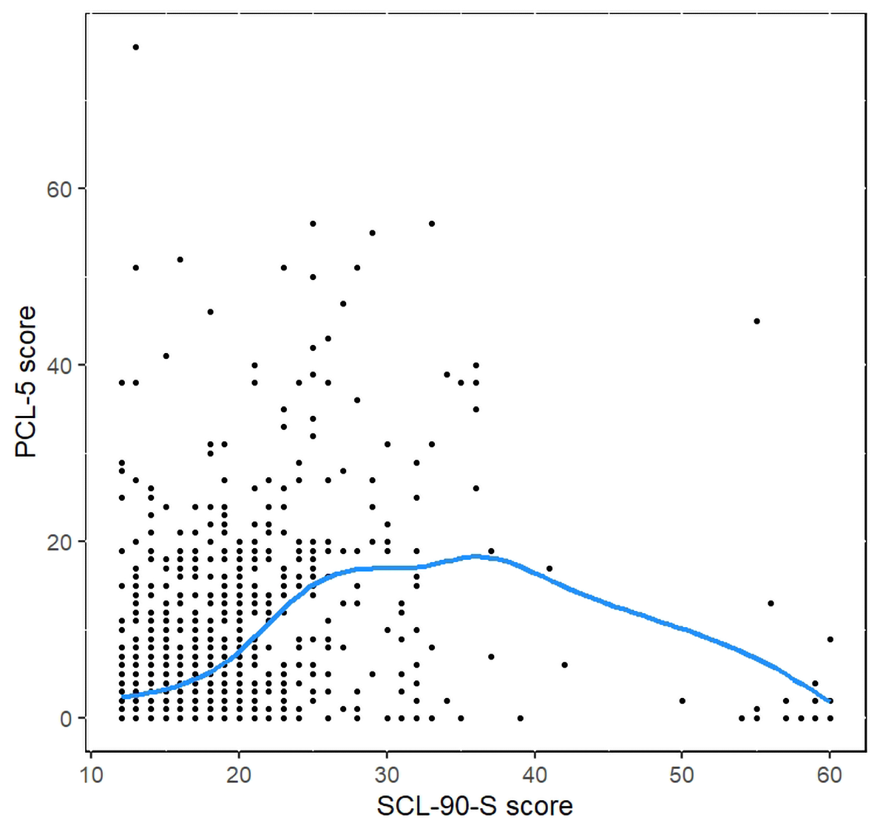


Figure S1 Scatter plot and linear prediction plot of SCL-90-S score and PCL-5 score.


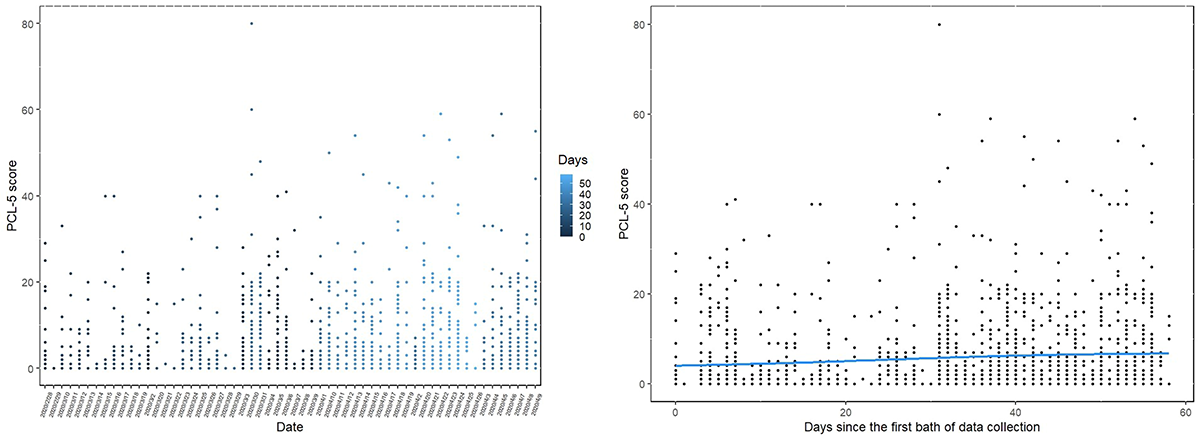


Figure S2 Left: scatter plot of data acquisition date and PCL-5 score, Days: number of days past from February 28, 2020; right: scatter and linear plot of number of days past from the first data acquisition date (February 28, 2020) and PCL-5 score.
